# Supplementary material for: Improved thermoelectric transport properties of Ge4Se3Te through dimensionality reduction
Source: Royal Society of Chemistry journal article supplement (doi:10.1039/d0tc04537c), 2020-12-21
Supplement: d0tc04537c1.pdf [file d0tc04537c1.pdf]

## Supporting Information

### Improved thermoelectric transport properties of Ge<sub>4</sub>Se<sub>3</sub>Te through dimensionality reduction

H.H. Huang<sup>a</sup>, Xiaofeng Fan<sup>a,\*</sup>, W.T. Zheng<sup>a,b</sup> and David J. Singh<sup>c,d</sup>

*a. Key Laboratory of Automobile Materials (Jilin University), Ministry of Education, and College of Materials Science and Engineering, Jilin University, Changchun, 130012, China*

*b. State Key Laboratory of Automotive Simulation and Control, Jilin University, Changchun 130012, China*

*c. Department of Physics and Astronomy, University of Missouri, Columbia, Missouri 65211-7010, USA*

*d. Department of Chemistry, University of Missouri, Columbia, Missouri 65211 USA*

*\*, Correspondence and requests for materials should be addressed,*

Email: [xffan@jlu.edu.cn](mailto:xffan@jlu.edu.cn) (X. Fan)

Tel: +86-159-4301-3494

Figure S1

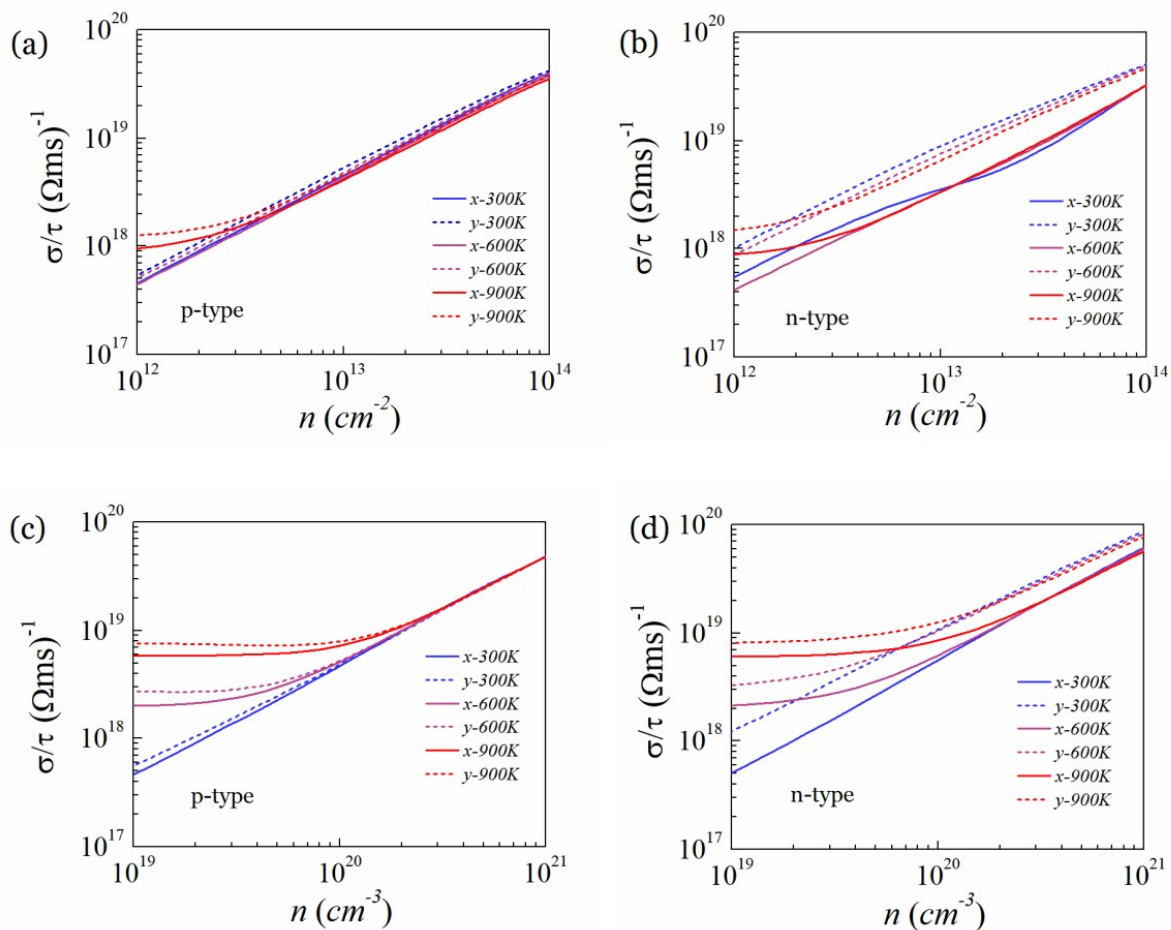

Fig.S1. Calculated the  $\sigma/\tau$  of the monolayer and bulk  $\text{Ge}_4\text{Se}_3\text{Te}$  as a function of the carrier concentration along the  $x$  and  $y$  directions for (a, c)  $p$ -type and (b, d)  $n$ -type doping at different temperature

Figure S2

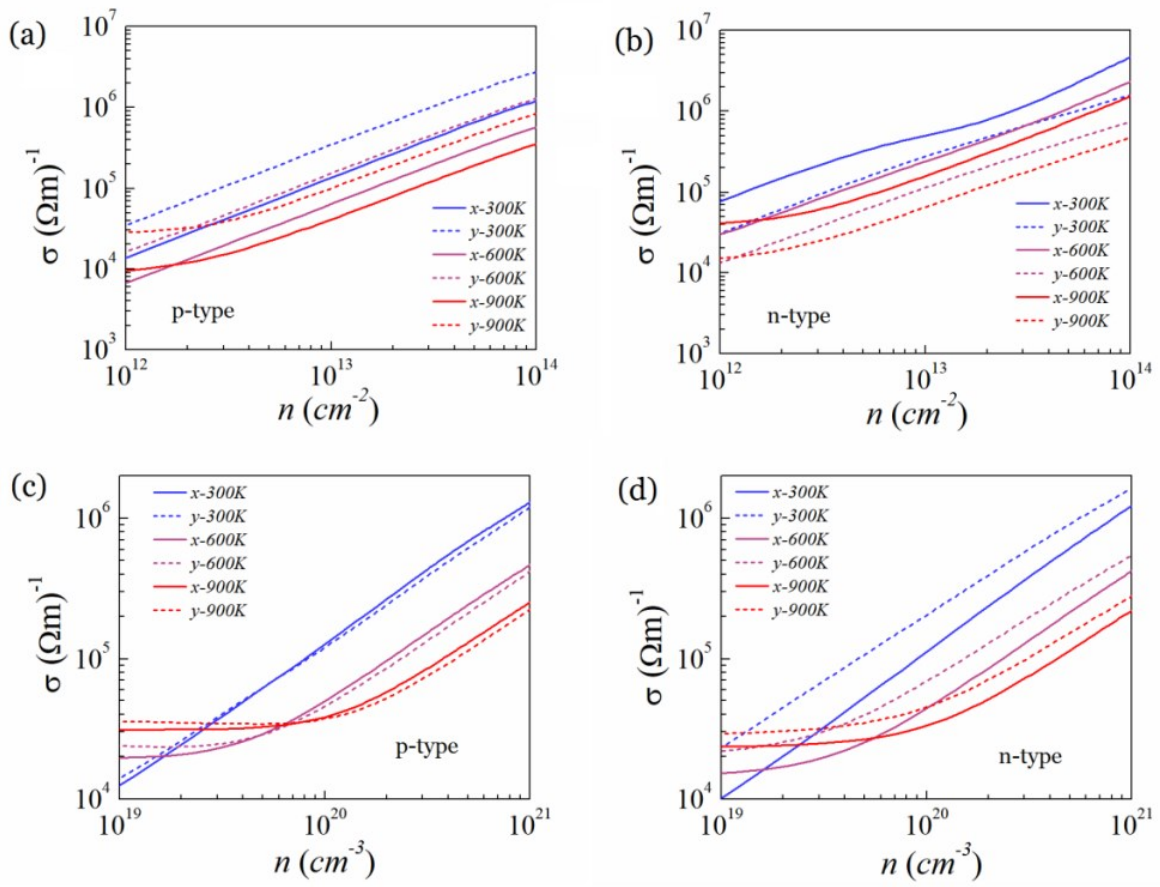

Fig.S2.The calculated carrier concentration-dependent electrical conductivity ( $\sigma$ ) of *p*-type (a, c) and *n*-type (b, d)  $\text{Ge}_4\text{Se}_3\text{Te}$  monolayer and bulk at different temperature along *x* and *y* direction, respectively

Figure S3

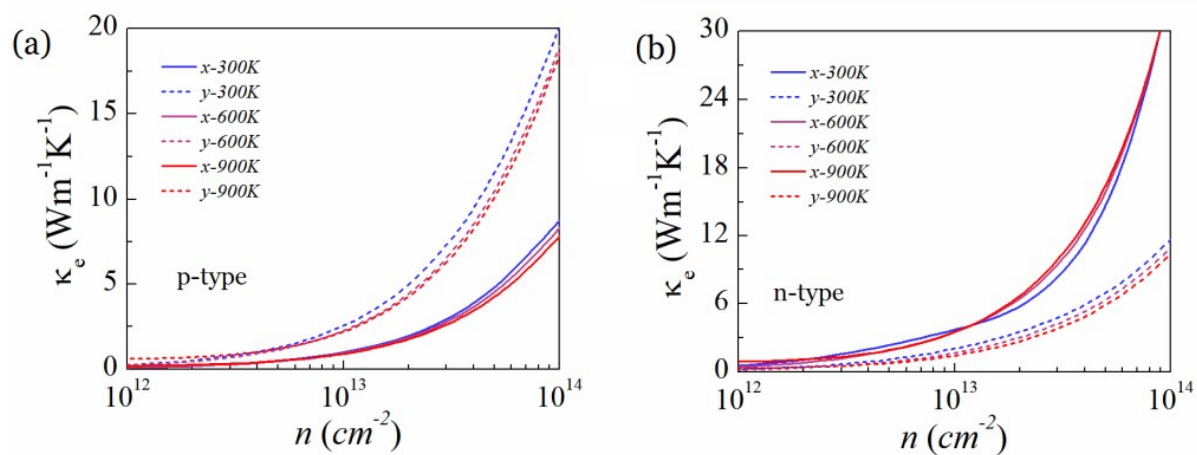

Fig.S3. Electronic thermal conductivity of  $\text{Ge}_4\text{Se}_3\text{Te}$  for the (a)  $p$ -type and (b)  $n$ -type doping
